# Supplementary material for: Sequence search and analysis of gene products containing RNA recognition motifs in the human genome
Source: PubMed Central journal article supplement (PMC4367854; doi:10.1186/1471-2164-15-1159), 2014-12-22
Supplement: 12864_2014_6891_MOESM1_ESM.pdf [file 12864_2014_6891_MOESM1_ESM.pdf]

**Additional file 1:** Taxonomic representation of RRM. The RRM families defined in Pfam were analyzed for their taxonomic distribution. Pfam families RRM\_2 and RRM have no representation in human genome and in the Mammalia class.

| Pfam family ID | Pfam family name | Total number of sequences in Eukaryota | Number of sequences in class Mammalia | Taxonomic distribution (Kingdom)                          |
|----------------|------------------|----------------------------------------|---------------------------------------|-----------------------------------------------------------|
| PF00076        | RRM_1            | 32653                                  | 7564                                  | Eukaryota (Metazoa, Viridiplantae and Fungi) and Bacteria |
| PF04059        | RRM_2            | 376                                    | -                                     | Viridiplantae and Fungi                                   |
| PF08777        | RRM_3            | 305                                    | 102                                   | Metazoa and Viridiplantae                                 |
| PF10598        | RRM_4            | 345                                    | 31                                    | Metazoa and Fungi                                         |
| PF13893        | RRM_5            | 4497                                   | 1347                                  | Metazoa, Viridiplantae and Fungi                          |
| PF14259        | RRM_6            | 6690                                   | 1673                                  | Metazoa, Viridiplantae and Fungi                          |
| PF10378        | RRM              | Fungal specific                        | -                                     | Fungi                                                     |
