# Supplementary material for: Sequence search and analysis of gene products containing RNA recognition motifs in the human genome
Source: PubMed Central journal article supplement (PMC4367854; doi:10.1186/1471-2164-15-1159), 2014-12-22
Supplement: 12864_2014_6891_MOESM4_ESM.pdf [file 12864_2014_6891_MOESM4_ESM.pdf]

**Additional file 4:** The *Homo sapiens* proteins (UniProt IDs) identified as RRM-containing using sequence searches.

|          |        |        |          |          |          |
|----------|--------|--------|----------|----------|----------|
| A0AV96   | E5RI26 | G3V2S9 | O60506-5 | Q13310-3 | Q8WUA2   |
| A0AV96-2 | E5RIX9 | G3V3K6 | O60812   | Q13595   | Q8WVV9   |
| A2A2V2   | E5RJ83 | G3V4C1 | O75494   | Q13595-2 | Q8WVV9-2 |
| A2ABK1   | E5RJB9 | G3V4M8 | O75494-2 | Q14011   | Q8WVV9-3 |
| A6NDE4   | E5RJMO | G3V4T2 | O75494-3 | Q14103   | Q8WVV9-4 |
| A6NDY0   | E5RJM8 | G3V4W0 | O75494-4 | Q14103-2 | Q8WXA9   |
| A6NDY0-2 | E5RJV8 | G3V4X6 | O75494-5 | Q14103-3 | Q8WXA9-2 |
| A6NDY0-4 | E5RJV8 | G3V546 | O75526   | Q14103-4 | Q8WXF0   |
| A6NEQ0   | E7EN40 | G3V555 | O75821   | Q14151   | Q8WXF1   |
| A6NFN3   | E7EN82 | G3V575 | O95104   | Q14498   | Q8WXF1-2 |
| A6NKZ9   | E7ENA5 | G3V576 | O95104-2 | Q14498-2 | Q92804   |
| A6NLN1   | E7ENA6 | G3V5K8 | O95319   | Q14498-3 | Q92804-2 |
| A6PVI3   | E7EPF2 | G3V5X6 | O95319-2 | Q14576   | Q92843-2 |
| A8K1C9   | E7EPM3 | G3V5Z6 | O95319-3 | Q14576-2 | Q92879   |
| A8MXP9   | E7EQJ0 | G3XAC6 | O95319-4 | Q14966   | Q92879-2 |
| B0LM41   | E7EQS3 | G3XAP0 | O95319-5 | Q14966-2 | Q92879-3 |
| B0QYK0   | E7EQV3 | G5E9J9 | O95453   | Q14966-3 | Q92879-4 |
| B0QYK1   | E7ERJ7 | G5E9M3 | O95453-2 | Q14966-4 | Q92904   |
| B0QYV1   | E7ERQ6 | G5EA30 | O95453-3 | Q14966-5 | Q92904-2 |
| B0QYY4   | E7ET15 | G8JLB6 | O95628   | Q15020   | Q93062   |
| B0QYY7   | E7ET38 | G8JLI7 | O95628-2 | Q15056   | Q93062-2 |
| B1AKF7   | E7ETC0 | G8JLP4 | O95628-3 | Q15056-2 | Q93062-3 |
| B1AKP7   | E7ETJ9 | H0Y3K3 | O95628-4 | Q15233   | Q93062-4 |
| B1ALY6   | E7ETM7 | H0Y4X3 | O95628-5 | Q15287   | Q93062-5 |
| B1AM48   | E7ETR3 | H0Y5F5 | O95628-6 | Q15287-2 | Q96B58   |
| B1AM49   | E7ETU5 | H0Y5U7 | O95628-7 | Q15287-3 | Q96DH6   |
| B1ANR0   | E7EU30 | H0Y623 | O95628-8 | Q15415   | Q96DH6-2 |
| B1ANR1   | E7EU33 | H0Y6E7 | O95758   | Q15415-2 | Q96DH6-3 |
| B1APY8   | E7EU39 | H0Y713 | O95758-1 | Q15424   | Q96DU9   |
| B1APY9   | E7EU98 | H0Y8D9 | O95758-2 | Q15427   | Q96E39   |
| B3KM87   | E7EUF4 | H0Y8G5 | O95758-4 | Q15434   | Q96EP5   |
| B3KSB0   | E7EV40 | H0Y8R1 | O95758-5 | Q15695   | Q96EP5-2 |
| B3KT61   | E7EVG6 | H0Y8T4 | O95758-6 | Q15696   | Q96H35   |
| B3KWE6   | E7EW00 | H0Y9D9 | P05455   | Q15717   | Q96I25   |
| B3KWU8   | E7EWI9 | H0YA61 | P07910   | Q16206   | Q96IC2   |
| B4DEH8   | E7EWR4 | H0YA82 | P07910-2 | Q16206-2 | Q96IC2-2 |
| B4DF29   | E7EX17 | H0YA96 | P07910-4 | Q16560   | Q96IZ5   |
| B4DFI3   | E9PAM1 | H0YAK1 | P08579   | Q16560-2 | Q96IZ5-2 |
| B4DHE8   | E9PAU2 | H0YAM1 | P08621   | Q16629   | Q96J87   |

|        |        |        |          |          |          |
|--------|--------|--------|----------|----------|----------|
| B4DHY1 | E9PB47 | H0YAP2 | P08621-2 | Q16629-2 | Q96J87-2 |
| B4DI28 | E9PB51 | H0YAQ2 | P08621-3 | Q16629-3 | Q96J87-3 |
| B4DIB6 | E9PB61 | H0YAR2 | P09012   | Q16630   | Q96J87-4 |
| B4DJ45 | E9PBY2 | H0YB39 | P09651   | Q16630-2 | Q96LT9   |
| B4DJK0 | E9PC62 | H0YB86 | P09651-2 | Q16630-3 | Q96PK6   |
| B4DM51 | E9PCY7 | H0YBB3 | P09651-3 | Q17RY0   | Q96PK6-2 |
| B4DMM2 | E9PDD9 | H0YBD7 | P0C7P1   | Q17RY0-2 | Q96T37   |
| B4DN88 | E9PEG6 | H0YBG7 | P0CB38   | Q17RY0-3 | Q96T37-2 |
| B4DN89 | E9PEQ6 | H0YBN4 | P0DJD3   | Q1RMF9   | Q96T37-3 |
| B4DQI6 | E9PFH8 | H0YBQ4 | P0DJD3-2 | Q2L7G6   | Q96T58   |
| B4DQL3 | E9PFS2 | H0YBR2 | P0DJD4   | Q2M296   | Q99729   |
| B4DS13 | E9PGM9 | H0YBU9 | P11940   | Q2M296-2 | Q99729-2 |
| B4DSB0 | E9PGX9 | H0YCC8 | P11940-2 | Q2PYN1   | Q99729-3 |
| B4DSS8 | E9PIA5 | H0YCP8 | P14866   | Q32P51   | Q99729-4 |
| B4DSU6 | E9PID8 | H0YEM1 | P14866-2 | Q49AS9   | Q9BQ04   |
| B4DTC1 | E9PK21 | H0YEQ8 | P18615   | Q4G0J3   | Q9BRL6   |
| B4DTC3 | E9PKA1 | H0YEU6 | P19338   | Q4G0J3-2 | Q9BRL6-2 |
| B4DUA4 | E9PKU1 | H0YFY9 | P22626   | Q4VXU2   | Q9BRS8   |
| B4DUA9 | E9PL19 | H0YGN7 | P22626-2 | Q4VY17   | Q9BTD8   |
| B4DUN1 | E9PLB0 | H0YH80 | P23246   | Q5H918   | Q9BTD8-2 |
| B4DVB8 | E9PM61 | H0YHB7 | P23246-2 | Q5H919   | Q9BTD8-3 |
| B4DWT1 | E9PMU7 | H0YHU8 | P23588   | Q5JB52   | Q9BTD8-4 |
| B4DY08 | E9PN18 | H0YIB4 | P26368   | Q5JQF3   | Q9BWF3   |
| B4DYX9 | E9PQ56 | H0YIL2 | P26368-2 | Q5JQF8   | Q9BWF3-2 |
| B4DZ27 | E9PQK4 | H0YJ07 | P26378   | Q5JRI1   | Q9BWF3-3 |
| B4E241 | E9PQU5 | H0YJ40 | P26378-2 | Q5JRI3   | Q9BX46   |
| B4E2X2 | E9PSF1 | H0YJH9 | P26378-3 | Q5QP21   | Q9BY77   |
| B4E3T4 | E9PSH0 | H0YJJ3 | P26378-4 | Q5QP22   | Q9BY77-2 |
| B7WPG3 | F2Z2G3 | H0YJU7 | P26378-5 | Q5QP23   | Q9BYG3   |
| B7Z1U7 | F2Z2U1 | H0YJW7 | P26599   | Q5QPL9   | Q9BZB8   |
| B7Z2F6 | F2Z2W2 | H0YKS1 | P26599-2 | Q5QPM1   | Q9BZB8-2 |
| B7Z2K5 | F2Z2W7 | H0YN19 | P26599-3 | Q5QPM2   | Q9BZB8-3 |
| B7Z888 | F5GWK3 | H3BMM9 | P29558   | Q5RL73   | Q9BZB8-4 |
| B7Z8Z7 | F5GWN9 | H3BMS0 | P29558-2 | Q5SZ64   | Q9BZC1   |
| B7ZKM0 | F5GXV1 | H3BNC1 | P31483   | Q5SZQ7   | Q9BZC1-2 |
| B7ZLQ8 | F5GXV8 | H3BNC9 | P31483-2 | Q5SZQ8   | Q9BZC1-3 |
| B7ZMD9 | F5GY08 | H3BNY3 | P31942   | Q5SZQ8-2 | Q9BZC1-4 |
| B8ZZ74 | F5GYA8 | H3BPE7 | P31942-2 | Q5SZQ8-3 | Q9BZC1-5 |
| B9ZVT1 | F5GYZ3 | H3BPG5 | P31942-3 | Q5T0W7   | Q9GZT3   |
| C9IYN3 | F5GZT4 | H3BPI5 | P31942-4 | Q5T481   | Q9H0L4   |
| C9IZL7 | F5GZU3 | H3BR27 | P31942-5 | Q5T8P6   | Q9H0Z9   |
| C9J286 | F5H047 | H3BR57 | P31942-6 | Q5T8P6-2 | Q9H0Z9-2 |

|        |        |        |          |          |          |
|--------|--------|--------|----------|----------|----------|
| C9J2Z9 | F5H0D8 | H3BRB1 | P31943   | Q5T8P6-3 | Q9H361   |
| C9J323 | F5H0H3 | H3BT71 | P33240   | Q5T8P6-4 | Q9H6E5   |
| C9J4X2 | F5H0I5 | H3BTC0 | P33240-2 | Q5T8P6-5 | Q9H6T0   |
| C9J6C5 | F5H0M7 | H3BUA9 | P35637   | Q5TGA3   | Q9H6T0-2 |
| C9J787 | F5H0R1 | H3BV80 | P35637-2 | Q5VV67   | Q9HCJ3   |
| C9J9B2 | F5H101 | H7BXE3 | P38159   | Q5VV67-2 | Q9HCJ3-2 |
| C9JAA9 | F5H160 | H7BXF3 | P38159-2 | Q5VZ19   | Q9NQ94   |
| C9JAB2 | F5H330 | H7BXH8 | P38159-3 | Q5VZ19-2 | Q9NQ94-2 |
| C9JB16 | F5H357 | H7BY16 | P42696   | Q5VZZ6   | Q9NQ94-3 |
| C9JBI6 | F5H3W3 | H7BY36 | P42696-2 | Q6NXG1   | Q9NQ94-4 |
| C9JE21 | F5H4D6 | H7BY49 | P43243   | Q6NXG1-2 | Q9NQ94-5 |
| C9JFZ1 | F5H4Y5 | H7BZE0 | P43243-2 | Q6NXG1-3 | Q9NQ94-6 |
| C9JGE3 | F5H532 | H7C367 | P49756   | Q6NXG1-4 | Q9NQZ3   |
| C9JIJ9 | F5H540 | H7C3F4 | P49756-2 | Q6P2Q9   | Q9NR90   |
| C9JJZ7 | F5H5I6 | H7C476 | P49756-3 | Q6XE24   | Q9NR90-2 |
| C9JKX0 | F5H606 | H7C5G8 | P51991   | Q6XE24-2 | Q9NTZ6   |
| C9JLZ0 | F5H659 | I3L0B6 | P51991-2 | Q6XE24-3 | Q9NVM6   |
| C9JM38 | F5H669 | I3L0J9 | P52272   | Q6XE24-4 | Q9NW13   |
| C9JQX9 | F5H674 | I3L1D4 | P52272-2 | Q6ZP01   | Q9NW64   |
| C9JT33 | F5H6M0 | I3L521 | P52298   | Q6ZRY4   | Q9NW64-2 |
| C9JTN7 | F5H6R6 | J3KMY7 | P52298-2 | Q76FK4   | Q9NWB1   |
| C9JYS8 | F5H8B8 | J3KN18 | P52597   | Q76FK4-4 | Q9NWB1-2 |
| C9JZG1 | F6S8J2 | J3KN28 | P52756   | Q7Z5Q1   | Q9NWB1-3 |
| C9K041 | F6T1J1 | J3KN81 | P55795   | Q7Z5Q1-3 | Q9NWB1-4 |
| D6R9D6 | F6UBL3 | J3KNW3 | P55884   | Q7Z5Q1-4 | Q9NWB1-5 |
| D6R9K7 | F6VZ39 | J3KP15 | P55884-2 | Q7Z5Q1-5 | Q9NWH9   |
| D6R9M7 | F6W1U9 | J3KPD3 | P57052   | Q7Z5Q1-6 | Q9NX07   |
| D6R9P3 | F6WRY4 | J3KPK1 | P62995   | Q7Z5Q1-7 | Q9NX07-2 |
| D6R9T0 | F8VP89 | J3KPK3 | P62995-3 | Q86SE5   | Q9NZI8   |
| D6R9Z6 | F8VQP3 | J3KQ82 | P78332   | Q86SG3   | Q9P1R7   |
| D6RA49 | F8VR27 | J3KQA8 | P84103   | Q86SG3-2 | Q9P2K5   |
| D6RAF8 | F8VRQ1 | J3KQV8 | P98175   | Q86U06   | Q9P2K5-2 |
| D6RAM1 | F8VRS4 | J3KSR8 | P98175-2 | Q86U06-2 | Q9P2K5-3 |
| D6RBI2 | F8VRU1 | J3KSW7 | P98175-3 | Q86U06-3 | Q9P2N5   |
| D6RBK5 | F8VSB5 | J3KTC1 | P98175-4 | Q86U06-4 | Q9UBK2   |
| D6RBM0 | F8VSC7 | J3KTH5 | P98179   | Q86U06-5 | Q9UHX1   |
| D6RBP6 | F8VTQ5 | J3KTL2 | Q01081   | Q86U42   | Q9UHX1-2 |
| D6RBQ9 | F8VV01 | J3QKT5 | Q01081-2 | Q86U42-2 | Q9UHX1-3 |
| D6RBS9 | F8VV04 | J3QKU3 | Q01081-4 | Q86V81   | Q9UHX1-4 |
| D6RBZ0 | F8VVB8 | J3QL05 | Q01085   | Q86YN6   | Q9UHX1-5 |
| D6RD18 | F8VX11 | J3QQV5 | Q01085-2 | Q86YN6-2 | Q9UHX1-6 |
| D6RD83 | F8VXY0 | J3QQZ2 | Q01130   | Q86YN6-3 | Q9UKA9   |

|        |        |           |          |          |          |
|--------|--------|-----------|----------|----------|----------|
| D6RDLO | F8VXY6 | J3QRF4    | Q01844   | Q86YN6-4 | Q9UKA9-2 |
| D6RDU3 | F8VYE9 | J3QRR5    | Q01844-2 | Q86YN6-5 | Q9UKA9-3 |
| D6RE02 | F8VYN5 | J3QT21    | Q01844-3 | Q86YN6-6 | Q9UKA9-4 |
| D6REM6 | F8VZ49 | J3QT54    | Q01844-5 | Q8IUH3   | Q9UKA9-5 |
| D6REZ6 | F8VZG9 | O00425    | Q02040-2 | Q8IUH3-2 | Q9UKA9-6 |
| D6RF41 | F8VZY7 | O14979    | Q02040-3 | Q8IUH3-3 | Q9UKM9   |
| D6RF44 | F8W0K0 | O14979-2  | Q07955   | Q8IXT5   | Q9UKM9-2 |
| D6RFF0 | F8W1S7 | O14979-3  | Q07955-2 | Q8IY67   | Q9ULW3   |
| D6RFL5 | F8W1T6 | O15042    | Q07955-3 | Q8IY67-2 | Q9UN86   |
| D6RFM3 | F8W646 | O15042-2  | Q08170   | Q8IYX4   | Q9UN86-2 |
| D6RGD8 | F8W6I7 | O15047    | Q12849   | Q8IZ69   | Q9UNP9   |
| D6RIA2 | F8W8I6 | O43251    | Q12849-5 | Q8IZ69-2 | Q9UNP9-2 |
| D6RIH9 | F8W930 | O43251-10 | Q12926   | Q8N684   | Q9UPN6   |
| D6RIT2 | F8W940 | O43251-2  | Q12926-2 | Q8N684-2 | Q9UPS6   |
| D6RIU0 | F8W9F8 | O43251-3  | Q13117   | Q8N684-3 | Q9Y388   |
| D6RJ04 | F8WA97 | O43251-4  | Q13117-2 | Q8N6W0   | Q9Y3B4   |
| D6W592 | F8WB35 | O43251-5  | Q13117-3 | Q8N6W0-2 | Q9Y4C8   |
| E1P5S2 | F8WCA5 | O43251-6  | Q13148   | Q8N7X1   | Q9Y4F3   |
| E2PSN0 | F8WD15 | O43251-7  | Q13148-2 | Q8N9W6   | Q9Y4F3-3 |
| E5RFD8 | F8WD91 | O43251-8  | Q13148-3 | Q8N9W6-2 | Q9Y4F3-4 |
| E5RFP2 | F8WDX3 | O43251-9  | Q13151   | Q8N9W6-3 | Q9Y4F3-5 |
| E5RFV3 | F8WE16 | O43347    | Q13242   | Q8N9W6-4 | Q9Y580   |
| E5RG67 | F8WE42 | O43390    | Q13243   | Q8NDT2   | Q9Y5S9   |
| E5RG71 | F8WJN3 | O43390-2  | Q13243-2 | Q8NE35   | Q9Y5S9-2 |
| E5RGC4 | G3V129 | O43426    | Q13243-3 | Q8NE35-2 | Q9Y6M1   |
| E5RGH3 | G3V162 | O43426-2  | Q13247   | Q8TAS1   | Q9Y6M1-1 |
| E5RGH4 | G3V1M1 | O43426-4  | Q13247-2 | Q8TBF4   | Q9Y6M1-3 |
| E5RGV0 | G3V1V1 | O43719    | Q13247-3 | Q8TBY0   | Q9Y6M1-4 |
| E5RGV5 | G3V251 | O60506    | Q13283   | Q8TC92   | Q9Y6M1-5 |
| E5RH24 | G3V2B4 | O60506-2  | Q13287   | Q8WU68   | Q9Y6M1-6 |
| E5RHG1 | G3V2H6 | O60506-3  | Q13310   | Q8WU68-2 |          |
| E5RHG7 | G3V2Q1 | O60506-4  | Q13310-2 | Q8WU68-3 |          |
