# Supplementary material for: Sequence search and analysis of gene products containing RNA recognition motifs in the human genome
Source: PubMed Central journal article supplement (PMC4367854; doi:10.1186/1471-2164-15-1159), 2014-12-22
Supplement: 12864_2014_6891_MOESM5_ESM.pdf [file 12864_2014_6891_MOESM5_ESM.pdf]

**Additional file 5:** GO biological process of single domain containing proteins. The single domain containing proteins were analyzed for their GO biological processes (BP). 153 proteins possess only one domain and only 39 of these have annotated GO BP. These map to 145 unique biological processes.

| Single RRM containing proteins                          | Uniprot ID | GO biological process                                                                                        | Pfam domain |
|---------------------------------------------------------|------------|--------------------------------------------------------------------------------------------------------------|-------------|
| Nuclear cap-binding protein subunit 2-like              | A6PVI3     | GO:0045292                                                                                                   | RRM_1       |
| Polyadenylate-binding protein 1                         | E5RJB9     | GO:0031047<br>GO:0060213<br>GO:1900153                                                                       | RRM_1       |
| Lupus La protein                                        | E9PGX9     | GO:0006396                                                                                                   | RRM_1       |
| CUGBP Elav-like family member 1                         | E9PKU1     | GO:0006376<br>GO:0007286<br>GO:0040018                                                                       | RRM_1       |
| Squamous cell carcinoma antigen recognized by T-cells 3 | F8VV04     | GO:0006396                                                                                                   | RRM_1       |
| Nucleolysin TIA-1 isoform p40                           | F8WE16     | GO:0017148<br>GO:0042036                                                                                     | RRM_1       |
| RNA-binding protein 39                                  | H0Y4X3     | GO:0006397                                                                                                   | RRM_1       |
| Serine/arginine-rich splicing factor 10                 | O75494     | GO:0000244<br>GO:0000375<br>GO:0000398<br>GO:0006355<br>GO:0006376<br>GO:0006406<br>GO:0016482<br>GO:0048025 | RRM_1       |
| Heterogeneous nuclear ribonucleoproteins C1/C2          | P07910     | GO:0000398<br>GO:0008380<br>GO:0010467                                                                       | RRM_1       |

|                                        |        |                                                                                                                                                                                                                                                                                                                  |       |
|----------------------------------------|--------|------------------------------------------------------------------------------------------------------------------------------------------------------------------------------------------------------------------------------------------------------------------------------------------------------------------|-------|
|                                        |        | GO:0000184<br>GO:0000387<br>GO:0000398<br>GO:0006366<br>GO:0006368<br>GO:0006369<br>GO:0006370<br>GO:0006406<br>GO:0006408<br>GO:0006446<br>GO:0008334<br>GO:0008380<br>GO:0010467<br>GO:0016032<br>GO:0016070<br>GO:0016071<br>GO:0031047<br>GO:0031124<br>GO:0034660<br>GO:0045292<br>GO:0046833<br>GO:0050434 |       |
| Nuclear cap-binding protein subunit 2  | P52298 |                                                                                                                                                                                                                                                                                                                  | RRM_1 |
|                                        |        | GO:0000381<br>GO:0006397<br>GO:0007275<br>GO:0008380<br>GO:0030154<br>GO:0034599                                                                                                                                                                                                                                 |       |
| Splicing regulator RBM11               | P57052 |                                                                                                                                                                                                                                                                                                                  | RRM_1 |
|                                        |        | GO:0000375<br>GO:0000381<br>GO:0000398<br>GO:0048026                                                                                                                                                                                                                                                             |       |
| Transformer-2 protein homolog beta     | P62995 |                                                                                                                                                                                                                                                                                                                  | RRM_1 |
|                                        |        | GO:0000398<br>GO:0006366<br>GO:0006369<br>GO:0006406<br>GO:0008380<br>GO:0010467<br>GO:0031124                                                                                                                                                                                                                   |       |
| Serine/arginine-rich splicing factor 3 | P84103 |                                                                                                                                                                                                                                                                                                                  | RRM_1 |
|                                        |        | GO:0006396<br>GO:0006412<br>GO:0006417<br>GO:0009409<br>GO:0035196<br>GO:0045727                                                                                                                                                                                                                                 |       |
| Putative RNA-binding protein 3         | P98179 |                                                                                                                                                                                                                                                                                                                  | RRM_1 |

|                                               |        |                                                                                                                                                                                                  |       |
|-----------------------------------------------|--------|--------------------------------------------------------------------------------------------------------------------------------------------------------------------------------------------------|-------|
| Serine/arginine-rich splicing factor 2        | Q01130 | GO:0000398<br>GO:0006366<br>GO:0006369<br>GO:0006397<br>GO:0006406<br>GO:0008380<br>GO:0010467<br>GO:0031124<br>GO:2001141                                                                       | RRM_1 |
| Transformer-2 protein homolog alpha           | Q13595 | GO:0000398                                                                                                                                                                                       | RRM_1 |
| Cold-inducible RNA-binding protein            | Q14011 | GO:0009409<br>GO:0009411<br>GO:0034063<br>GO:0045727<br>GO:0048255                                                                                                                               | RRM_1 |
| Eukaryotic translation initiation factor 4H   | Q15056 | GO:0006412<br>GO:0006413<br>GO:0006446<br>GO:0010467<br>GO:0016032<br>GO:0019953<br>GO:0044267<br>GO:0048589                                                                                     | RRM_1 |
| RNA-binding protein with serine-rich domain 1 | Q15287 | GO:0000184<br>GO:0000381<br>GO:0000398<br>GO:0006351<br>GO:0006366<br>GO:0006369<br>GO:0006406<br>GO:0008380<br>GO:0010467<br>GO:0016070<br>GO:0016071<br>GO:0031124<br>GO:0043065<br>GO:0048025 | RRM_1 |
| Ecto-NOX disulfide-thiol exchanger 2          | Q16206 | GO:0007624<br>GO:0016049<br>GO:0040008<br>GO:0055114                                                                                                                                             | RRM_1 |

|                                                                                |        |                                                                                                                                                                                                                                                                                      |       |
|--------------------------------------------------------------------------------|--------|--------------------------------------------------------------------------------------------------------------------------------------------------------------------------------------------------------------------------------------------------------------------------------------|-------|
|                                                                                |        | GO:0000398<br>GO:0006366<br>GO:0006369<br>GO:0006397<br>GO:0006406<br>GO:0008380<br>GO:0010467<br>GO:0031124<br>GO:0048025                                                                                                                                                           |       |
| Serine/arginine-rich splicing factor 7                                         | Q16629 |                                                                                                                                                                                                                                                                                      | RRM_1 |
| Peroxisome proliferator-activated receptor gamma coactivator-related protein 1 | Q5VV67 | GO:0006351<br>GO:0006355                                                                                                                                                                                                                                                             | RRM_1 |
|                                                                                |        | GO:0001503<br>GO:0006355<br>GO:0006366<br>GO:0006390<br>GO:0007015<br>GO:0010469<br>GO:0010694<br>GO:0030520<br>GO:0034614<br>GO:0042327<br>GO:0044255<br>GO:0044281<br>GO:0045672<br>GO:0045780<br>GO:0045892<br>GO:0045944<br>GO:0051384<br>GO:0051591<br>GO:0060346<br>GO:2000273 |       |
| Peroxisome proliferator-activated receptor gamma coactivator 1-beta            | Q86YN6 |                                                                                                                                                                                                                                                                                      | RRM_1 |
| Zinc finger CCHC-type and RNA-binding motif-containing protein 1               | Q8TBF4 | GO:0006397<br>GO:0008380                                                                                                                                                                                                                                                             | RRM_1 |
| Ecto-NOX disulfide-thiol exchanger 1                                           | Q8TC92 | GO:0048511                                                                                                                                                                                                                                                                           | RRM_1 |
|                                                                                |        | GO:0000244<br>GO:0000381<br>GO:0000395<br>GO:0016482<br>GO:0048025                                                                                                                                                                                                                   |       |
| Serine/arginine-rich splicing factor 12                                        | Q8WXF0 |                                                                                                                                                                                                                                                                                      | RRM_1 |
| Serine/arginine-rich splicing factor 8                                         | Q9BRL6 | GO:0006397<br>GO:0008380                                                                                                                                                                                                                                                             | RRM_1 |

|                                                                      |        |                                                                                                                                                                                                                                                                                                                                                                          |       |
|----------------------------------------------------------------------|--------|--------------------------------------------------------------------------------------------------------------------------------------------------------------------------------------------------------------------------------------------------------------------------------------------------------------------------------------------------------------------------|-------|
| RNA-binding protein 24                                               | Q9BX46 | GO:0010830<br>GO:0030154<br>GO:0043488                                                                                                                                                                                                                                                                                                                                   | RRM_1 |
| Polymerase delta-interacting protein 3                               | Q9BY77 | GO:0016973<br>GO:0045727                                                                                                                                                                                                                                                                                                                                                 | RRM_1 |
| RNA-binding protein 38                                               | Q9H0Z9 | GO:0006397<br>GO:0006977<br>GO:0006978<br>GO:0007049<br>GO:0007050<br>GO:0008285<br>GO:0008380<br>GO:0010830<br>GO:0030154<br>GO:0043484<br>GO:0070935                                                                                                                                                                                                                   | RRM_1 |
| Pre-mRNA-splicing factor RBM22                                       | Q9NW64 | GO:0000060<br>GO:0000398<br>GO:0033120<br>GO:0035690<br>GO:0045292<br>GO:0090316                                                                                                                                                                                                                                                                                         | RRM_1 |
| Peroxisome proliferator-activated receptor gamma coactivator 1-alpha | Q9UBK2 | GO:0001659<br>GO:0001678<br>GO:0006012<br>GO:0006094<br>GO:0006355<br>GO:0006367<br>GO:0006397<br>GO:0006461<br>GO:0007005<br>GO:0007586<br>GO:0008209<br>GO:0008380<br>GO:0009409<br>GO:0010822<br>GO:0010941<br>GO:0014850<br>GO:0019395<br>GO:0022904<br>GO:0030521<br>GO:0034599<br>GO:0035066<br>GO:0036273<br>GO:0042594<br>GO:0043201<br>GO:0043524<br>GO:0045333 | RRM_1 |

|                                  |        |                                                                                                                                                                                                                                                                                                                                                            |       |
|----------------------------------|--------|------------------------------------------------------------------------------------------------------------------------------------------------------------------------------------------------------------------------------------------------------------------------------------------------------------------------------------------------------------|-------|
|                                  |        | GO:0045722<br>GO:0045820<br>GO:0045893<br>GO:0045944<br>GO:0046321<br>GO:0048661<br>GO:0050821<br>GO:0050873<br>GO:0051091<br>GO:0051552<br>GO:0070997<br>GO:0071250<br>GO:0071356<br>GO:0071398<br>GO:0071456<br>GO:0071871<br>GO:0071873<br>GO:0097067<br>GO:1901857<br>GO:1901860<br>GO:1901863<br>GO:2000272<br>GO:2000310<br>GO:2000507<br>GO:2001171 |       |
| RNA-binding protein Raly         | Q9UKM9 | GO:0000398                                                                                                                                                                                                                                                                                                                                                 | RRM_1 |
| Pre-mRNA branch site protein p14 | Q9Y3B4 | GO:0000398<br>GO:0008380<br>GO:0010467                                                                                                                                                                                                                                                                                                                     | RRM_1 |
| RNA-binding protein 8A           | Q9Y5S9 | GO:0000184<br>GO:0000381<br>GO:0000398<br>GO:0006366<br>GO:0006369<br>GO:0006406<br>GO:0006417<br>GO:0008380<br>GO:0010467<br>GO:0016070<br>GO:0016071<br>GO:0031124                                                                                                                                                                                       | RRM_1 |
| Nucleolar protein 8              | Q76FK4 | GO:0006260<br>GO:0006364<br>GO:0030307                                                                                                                                                                                                                                                                                                                     | RRM_6 |

|                                                           |        |                                                      |       |
|-----------------------------------------------------------|--------|------------------------------------------------------|-------|
| Cleavage and polyadenylation specificity factor subunit 6 | Q16630 | GO:0006378<br>GO:0006397<br>GO:0051262               | RRM_6 |
| RNA-binding protein 27                                    | Q9P2N5 | GO:0006397                                           | RRM_5 |
| RNA-binding protein 20                                    | Q5T481 | GO:0006397<br>GO:0007507<br>GO:0008380<br>GO:0033120 | RRM_5 |
