# Supplementary material for: Sequence search and analysis of gene products containing RNA recognition motifs in the human genome
Source: PubMed Central journal article supplement (PMC4367854; doi:10.1186/1471-2164-15-1159), 2014-12-22
Supplement: 12864_2014_6891_MOESM6_ESM.pdf [file 12864_2014_6891_MOESM6_ESM.pdf]

**Additional file 6:** Non-RRM co-existing domains. In some of the full-length RRM domain containing human proteins, non-RRM domains were also present. The table lists the 56 non-RRM domains, which co-exist with RRM domains and their associated functions.

| <b>Domain</b>   | <b>Function</b>                                                                |
|-----------------|--------------------------------------------------------------------------------|
| 5-FTHF_cyc-lig  | Biosynthesis of folic acid containing compounds                                |
| Bcl-2           | Apoptosis                                                                      |
| BH4             | Apoptosis                                                                      |
| CAF1            | Rnase; 3' to 5' mRNA deadenylation                                             |
| CBFNT           | Transcriptional regulation                                                     |
| CSTF_C          | Transcription termination                                                      |
| CSTF2_hinge     | Polyadenylation                                                                |
| CTD_bind        | RNA polymerase II-binding domain                                               |
| cwf21           | mRNA splicing                                                                  |
| DnaJ            | Chaperone                                                                      |
| DUF1866         | Unknown function                                                               |
| eIF2A           | Transaltion initiation                                                         |
| eIF3g           | Transaltion initiation                                                         |
| Exo_endo_phos   | Intracellular signaling; Endo and exonuclease                                  |
| FoP_duplication | Endonuclease-reverse transcriptase                                             |
| Fox-1_C         | Regulation of alternative splicing                                             |
| G-patch         | Present in DNA-repair proteins                                                 |
| GVQW            | Conserved but unknown function                                                 |
| hNIFK_binding   | Cell cycle regulation                                                          |
| HnRNP_M         | Regulation of splicing                                                         |
| HnRNPA1         | Regulation of alternative splicing                                             |
| IFP_35_N        | Antiviral                                                                      |
| KH_1            | Diverse RNA binding function                                                   |
| La              | Regulation of translation                                                      |
| Limkain-b1      | Monitoring of autoimmune diseases                                              |
| Lsm_interact    | pre m-RNA splicing                                                             |
| Methyltransf_31 | Methyltransferase                                                              |
| N-SET           | Regulation of gene expression                                                  |
| NID             | Antiviral                                                                      |
| NOPS            | Transcriptional regulation                                                     |
| NTF2            | Nuclear transport                                                              |
| NYN             | Components of the processome/degradosome that process tRNAs or ribosomal RNAs. |
| OST-HTH         | Nucleate or organise structurally related ribonucleoprotein (RNP) complexes    |

|                 |                                                                      |
|-----------------|----------------------------------------------------------------------|
| PABP            | Translation initiation and mRNA stabilisation/degradation            |
| PAP_assoc       | Polynucleotide adenylyltransferase                                   |
| Pkinase         | Protein kinases; diversity of functions including cellular signaling |
| Pro_isomerase   | Peptidyl-prolyl isomerisation, chaperone and cell signaling          |
| PRO8NT          | pre m-RNA splicing                                                   |
| PROCN           | pre m-RNA splicing                                                   |
| PWI             | pre-mRNA processing                                                  |
| RBM1CTR         | m-RNA binding                                                        |
| RNA_bind        | Unknown function                                                     |
| RNase_T         | End-turnover of tRNA                                                 |
| SAP             | Chromosomal organization                                             |
| SET             | Protein-protein interaction domain                                   |
| SPOC            | Developmental signaling                                              |
| Surp            | Regulation of alternative splicing                                   |
| SUZ-C           | Centrosome size regulation                                           |
| Syja_N          | Regulation of secretory pathway                                      |
| tRNA_U5-meth_tr | tRNA maturation                                                      |
| TUDOR           | Developmental signaling                                              |
| U1snRNP70_N     | Splicing                                                             |
| zf-CCCH         | Cell cycle regulation                                                |
| zf-CCHC         | DNA packaging                                                        |
| zf-RanBP        | Nuclear transport                                                    |
| zf-RNPHF        | Unknown function                                                     |
