# Supplementary material for: Sequence search and analysis of gene products containing RNA recognition motifs in the human genome
Source: PubMed Central journal article supplement (PMC4367854; doi:10.1186/1471-2164-15-1159), 2014-12-22
Supplement: 12864_2014_6891_MOESM8_ESM.pdf [file 12864_2014_6891_MOESM8_ESM.pdf]

**Additional file 8:** GO enrichment analysis.

The human proteins identified as RRM- containing were further analyzed to identify the most populated GO biological processes in which these proteins are involved.

There were six enriched GO biological processes and 42 human proteins map to these processes.

| <b>Uniprot Accession</b> | <b>Gene Name</b>                                                                                                                                                                          |
|--------------------------|-------------------------------------------------------------------------------------------------------------------------------------------------------------------------------------------|
| 772535                   | U2 small nuclear RNA auxiliary factor 2                                                                                                                                                   |
| 773774                   | small nuclear ribonucleoprotein polypeptide B"                                                                                                                                            |
| 776010                   | trinucleotide repeat containing 4                                                                                                                                                         |
| 776781                   | transformer 2 alpha homolog (Drosophila)                                                                                                                                                  |
| 777820                   | small nuclear ribonucleoprotein 70kDa (U1)                                                                                                                                                |
| 778766                   | splicing factor, arginine/serine-rich 7, 35kDa                                                                                                                                            |
| 781879                   | bruno-like 6, RNA-binding protein (Drosophila)                                                                                                                                            |
| 782425                   | heterogeneous nuclear ribonucleoprotein A0                                                                                                                                                |
| 782499                   | RNA-binding motif protein 5                                                                                                                                                               |
| 784244                   | PRP8 pre-mRNA processing factor 8 homolog (S. cerevisiae)                                                                                                                                 |
| 784420                   | heterogeneous nuclear ribonucleoprotein C (C1/C2)                                                                                                                                         |
| 785199                   | ribosomal protein L36a pseudogene 51; ribosomal protein L36a pseudogene 37; ribosomal protein L36a pseudogene 49; heterogeneous nuclear ribonucleoprotein H2 (H'); ribosomal protein L36a |
| 785327                   | RNA-binding motif protein 25                                                                                                                                                              |
| 785995                   | cleavage stimulation factor, 3' pre-RNA, subunit 2, 64kDa                                                                                                                                 |
| 786739                   | U2 small nuclear RNA auxiliary factor 1                                                                                                                                                   |
| 791398                   | heterogeneous nuclear ribonucleoprotein M                                                                                                                                                 |
| 794028                   | RNA-binding motif protein 8A                                                                                                                                                              |
| 794968                   | splicing factor, arginine/serine-rich 5                                                                                                                                                   |
| 795511                   | splicing factor 3B, 14 kDa subunit                                                                                                                                                        |
| 797048                   | transformer 2 beta homolog (Drosophila)                                                                                                                                                   |
| 798354                   | small nuclear ribonucleoprotein polypeptide A                                                                                                                                             |
| 799658                   | heterogeneous nuclear ribonucleoprotein D (AU-rich element RNA-binding protein 1, 37kDa)                                                                                                  |
| 800702                   | similar to RNA-binding motif protein, X-linked; similar to hCG2011544; RNA-binding motif protein, X-linked                                                                                |
| 802909                   | heterogeneous nuclear ribonucleoprotein H3 (2H9)                                                                                                                                          |
| 806156                   | splicing factor, arginine/serine-rich 6; similar to arginine/serine-rich splicing factor 6                                                                                                |
| 810069                   | heterogeneous nuclear ribonucleoprotein A3                                                                                                                                                |
| 810866                   | serine-arginine repressor protein (35 kDa)                                                                                                                                                |
| 811567                   | splicing factor, arginine/serine-rich 3                                                                                                                                                   |

|        |                                                                                                                                                                                                                                                                      |
|--------|----------------------------------------------------------------------------------------------------------------------------------------------------------------------------------------------------------------------------------------------------------------------|
| 812172 | similar to heterogeneous nuclear ribonucleoprotein L-like; heterogeneous nuclear ribonucleoprotein L                                                                                                                                                                 |
| 812300 | similar to ribonucleic acid binding protein S1; RNA-binding protein S1, serine-rich domain                                                                                                                                                                           |
| 812576 | splicing factor, arginine/serine-rich 2                                                                                                                                                                                                                              |
| 813541 | heterogeneous nuclear ribonucleoprotein F                                                                                                                                                                                                                            |
| 814227 | heterogeneous nuclear ribonucleoprotein A2/B1                                                                                                                                                                                                                        |
| 815252 | bruno-like 4, RNA-binding protein (Drosophila)                                                                                                                                                                                                                       |
| 816065 | splicing factor, arginine/serine-rich 9                                                                                                                                                                                                                              |
| 816714 | FUS interacting protein (serine/arginine-rich) 1; similar to FUS interacting protein (serine-arginine rich) 1                                                                                                                                                        |
| 818979 | splicing factor 3b, subunit 4, 49kDa                                                                                                                                                                                                                                 |
| 822152 | RNA-binding motif protein 15B                                                                                                                                                                                                                                        |
| 824519 | heterogeneous nuclear ribonucleoprotein A1-like 3; similar to heterogeneous nuclear ribonucleoprotein A1; heterogeneous nuclear ribonucleoprotein A1 pseudogene 2; heterogeneous nuclear ribonucleoprotein A1; heterogeneous nuclear ribonucleoprotein A1 pseudogene |
| 825011 | splicing factor, arginine/serine-rich 4                                                                                                                                                                                                                              |
| 825717 | nuclear cap binding protein subunit 2, 20kDa                                                                                                                                                                                                                         |
| 825901 | polypyrimidine tract binding protein 1                                                                                                                                                                                                                               |
