# Supplementary material for: Sequence search and analysis of gene products containing RNA recognition motifs in the human genome
Source: PubMed Central journal article supplement (PMC4367854; doi:10.1186/1471-2164-15-1159), 2014-12-22
Supplement: 12864_2014_6891_MOESM10_ESM.pdf [file 12864_2014_6891_MOESM10_ESM.pdf]

**Additional file 10:** RRM containing gene products involved in Mendelian diseases.

| <b>Ensembl ID</b> | <b>OMIM name</b>                                                                                             |
|-------------------|--------------------------------------------------------------------------------------------------------------|
| ENSG00000015479   | Myopathy, Distal, 2; Mpd2                                                                                    |
| ENSG00000075856   | Porokeratosis, Disseminated Superficial Actinic, 1; Dsap1                                                    |
| ENSG00000089280   | Histiocytoma, Angiomatoid Fibrous; Amyotrophic Lateral Sclerosis 6, With Or Without Frontotemporal Dementia; |
| ENSG00000100836   | Oculopharyngeal Muscular Dystrophy; Opmc                                                                     |
| ENSG00000106344   | Alopecia, Neurologic Defects, And Endocrinopathy Syndrome                                                    |
| ENSG00000120948   | Amyotrophic Lateral Sclerosis 10, With Or Without Frontotemporal Dementia;                                   |
| ENSG00000174231   | Retinitis Pigmentosa 13; Rp13                                                                                |
| ENSG00000182872   | Tarp Syndrome; Tarps                                                                                         |
| ENSG00000182944   | Ewing Sarcoma; Es; Histiocytoma, Angiomatoid Fibrous                                                         |
| ENSG00000187191   | Spermatogenic Failure, Y-Linked, 2; Spgfy2                                                                   |
| ENSG00000188120   | Spermatogenic Failure, Y-Linked, 2; Spgfy2                                                                   |
| ENSG00000203867   | Cardiomyopathy, Dilated, 1dd; Cmd1dd                                                                         |
| ENSG00000205916   | Spermatogenic Failure, Y-Linked, 2; Spgfy2                                                                   |
| ENSG00000205944   | Spermatogenic Failure, Y-Linked, 2; Spgfy2                                                                   |
