# Supplementary material for: Sequence search and analysis of gene products containing RNA recognition motifs in the human genome
Source: PubMed Central journal article supplement (PMC4367854; doi:10.1186/1471-2164-15-1159), 2014-12-22
Supplement: 12864_2014_6891_MOESM11_ESM.pdf [file 12864_2014_6891_MOESM11_ESM.pdf]

**Additional file 11:** Disorder content in RRM containing proteins. We analyzed the human RRM domain containing proteins for their disorder content using DISOPRED.

| <b>Protein</b> | <b>Total residues</b> | <b>Disordered</b> | <b>Ordered</b> | <b>% Disorder</b> | <b>% Order</b> |
|----------------|-----------------------|-------------------|----------------|-------------------|----------------|
| H7C3F4         | 600                   | 553               | 47             | 0.92              | 0.08           |
| Q9NWH9         | 1034                  | 951               | 83             | 0.92              | 0.08           |
| Q15424         | 915                   | 806               | 109            | 0.88              | 0.12           |
| Q14151         | 953                   | 837               | 116            | 0.88              | 0.12           |
| Q96T58         | 3664                  | 3214              | 450            | 0.88              | 0.12           |
| B4DS13         | 572                   | 495               | 77             | 0.87              | 0.13           |
| A6NDE4         | 496                   | 425               | 71             | 0.86              | 0.14           |
| Q92804         | 592                   | 507               | 85             | 0.86              | 0.14           |
| Q01844-5       | 661                   | 559               | 102            | 0.85              | 0.15           |
| B7ZMD9         | 459                   | 387               | 72             | 0.84              | 0.16           |
| P38159-2       | 378                   | 318               | 60             | 0.84              | 0.16           |
| B0QYK0         | 618                   | 518               | 100            | 0.84              | 0.16           |
| Q14966         | 1978                  | 1656              | 322            | 0.84              | 0.16           |
| B0QYK1         | 600                   | 500               | 100            | 0.83              | 0.17           |
| C9JGE3         | 583                   | 483               | 100            | 0.83              | 0.17           |
| Q5VV67         | 1664                  | 1373              | 291            | 0.83              | 0.17           |
| E7EX17         | 616                   | 501               | 115            | 0.81              | 0.19           |
| O75526         | 392                   | 318               | 74             | 0.81              | 0.19           |
| P38159         | 391                   | 317               | 74             | 0.81              | 0.19           |
| Q96E39         | 390                   | 316               | 74             | 0.81              | 0.19           |
| H3BPE7         | 527                   | 425               | 102            | 0.81              | 0.19           |
| P49756         | 843                   | 672               | 171            | 0.80              | 0.20           |
| Q9P2N5         | 1060                  | 840               | 220            | 0.79              | 0.21           |
| Q5T481         | 1227                  | 964               | 263            | 0.79              | 0.21           |
| O95104         | 1147                  | 900               | 247            | 0.78              | 0.22           |
| O95104-2       | 1125                  | 878               | 247            | 0.78              | 0.22           |
| Q76FK4         | 1167                  | 906               | 261            | 0.78              | 0.22           |
| Q86YN6         | 1023                  | 790               | 233            | 0.77              | 0.23           |
| Q5T8P6         | 1007                  | 776               | 231            | 0.77              | 0.23           |
| Q9UPS6         | 1923                  | 1479              | 444            | 0.77              | 0.23           |
| Q5T8P6-2       | 983                   | 753               | 230            | 0.77              | 0.23           |
| H7C5G8         | 186                   | 142               | 44             | 0.76              | 0.24           |
| Q9H0L4         | 616                   | 469               | 147            | 0.76              | 0.24           |
| Q15287         | 305                   | 232               | 73             | 0.76              | 0.24           |
| Q96PK6         | 669                   | 508               | 161            | 0.76              | 0.24           |
| Q08170         | 494                   | 375               | 119            | 0.76              | 0.24           |
| O15047         | 1707                  | 1285              | 422            | 0.75              | 0.25           |
| P62995         | 288                   | 216               | 72             | 0.75              | 0.25           |
| E7EWR4         | 597                   | 446               | 151            | 0.75              | 0.25           |
| P33240         | 577                   | 431               | 146            | 0.75              | 0.25           |
| H7BXE3         | 453                   | 338               | 115            | 0.75              | 0.25           |
| H0Y8D9         | 439                   | 327               | 112            | 0.74              | 0.26           |

|          |      |     |     |      |      |
|----------|------|-----|-----|------|------|
| Q13595   | 282  | 210 | 72  | 0.74 | 0.26 |
| J3KPD3   | 267  | 198 | 69  | 0.74 | 0.26 |
| Q76FK4-4 | 1129 | 834 | 295 | 0.74 | 0.26 |
| B7Z888   | 1337 | 987 | 350 | 0.74 | 0.26 |
| P33240-2 | 560  | 413 | 147 | 0.74 | 0.26 |
| Q9BRL6   | 282  | 207 | 75  | 0.73 | 0.27 |
| P57052   | 281  | 206 | 75  | 0.73 | 0.27 |
| P07910   | 306  | 223 | 83  | 0.73 | 0.27 |
| Q9BY77   | 421  | 305 | 116 | 0.72 | 0.28 |
| Q15287-3 | 268  | 194 | 74  | 0.72 | 0.28 |
| Q9BRL6-2 | 275  | 199 | 76  | 0.72 | 0.28 |
| Q9BYG3   | 293  | 212 | 81  | 0.72 | 0.28 |
| F8VX11   | 360  | 260 | 100 | 0.72 | 0.28 |
| Q9UKM9   | 306  | 221 | 85  | 0.72 | 0.28 |
| Q16630   | 551  | 396 | 155 | 0.72 | 0.28 |
| Q16630-2 | 588  | 421 | 167 | 0.72 | 0.28 |
| Q9BY77-2 | 392  | 280 | 112 | 0.71 | 0.29 |
| Q16629   | 238  | 170 | 68  | 0.71 | 0.29 |
| A8MXP9   | 895  | 639 | 256 | 0.71 | 0.29 |
| Q8WXF0   | 261  | 186 | 75  | 0.71 | 0.29 |
| B4DYX9   | 387  | 275 | 112 | 0.71 | 0.29 |
| Q15056   | 248  | 175 | 73  | 0.71 | 0.29 |
| Q9UBK2   | 798  | 563 | 235 | 0.71 | 0.29 |
| O95628-6 | 767  | 539 | 228 | 0.70 | 0.30 |
| O75494   | 262  | 184 | 78  | 0.70 | 0.30 |
| O15042   | 1029 | 722 | 307 | 0.70 | 0.30 |
| H0YA82   | 334  | 234 | 100 | 0.70 | 0.30 |
| P43243   | 847  | 593 | 254 | 0.70 | 0.30 |
| Q9UKM9-2 | 290  | 202 | 88  | 0.70 | 0.30 |
| H3BMS0   | 257  | 179 | 78  | 0.70 | 0.30 |
| P98175   | 930  | 644 | 286 | 0.69 | 0.31 |
| O43719   | 755  | 520 | 235 | 0.69 | 0.31 |
| A2A2V2   | 408  | 281 | 127 | 0.69 | 0.31 |
| P23246   | 707  | 486 | 221 | 0.69 | 0.31 |
| E7EPM3   | 1007 | 689 | 318 | 0.68 | 0.32 |
| Q9Y388   | 322  | 220 | 102 | 0.68 | 0.32 |
| O60812   | 293  | 200 | 93  | 0.68 | 0.32 |
| P07910-2 | 293  | 200 | 93  | 0.68 | 0.32 |
| Q15696   | 482  | 328 | 154 | 0.68 | 0.32 |
| Q9ULW3   | 272  | 185 | 87  | 0.68 | 0.32 |
| B4DUN1   | 350  | 238 | 112 | 0.68 | 0.32 |
| P98175-3 | 853  | 580 | 273 | 0.68 | 0.32 |
| E9PB61   | 264  | 179 | 85  | 0.68 | 0.32 |
| F5H160   | 1034 | 701 | 333 | 0.68 | 0.32 |
| P52272   | 730  | 493 | 237 | 0.68 | 0.32 |
| Q17RY0   | 729  | 492 | 237 | 0.67 | 0.33 |

|          |     |     |     |      |      |
|----------|-----|-----|-----|------|------|
| Q8N684-3 | 514 | 346 | 168 | 0.67 | 0.33 |
| Q15695   | 479 | 321 | 158 | 0.67 | 0.33 |
| Q16206   | 610 | 407 | 203 | 0.67 | 0.33 |
| B0LM41   | 339 | 226 | 113 | 0.67 | 0.33 |
| Q15056-2 | 228 | 152 | 76  | 0.67 | 0.33 |
| H0YN19   | 290 | 193 | 97  | 0.67 | 0.33 |
| Q8TC92   | 643 | 427 | 216 | 0.66 | 0.34 |
| J3QT21   | 434 | 288 | 146 | 0.66 | 0.34 |
| P52756   | 815 | 540 | 275 | 0.66 | 0.34 |
| B3KT61   | 280 | 185 | 95  | 0.66 | 0.34 |
| Q8TBF4   | 217 | 143 | 74  | 0.66 | 0.34 |
| H3BV80   | 211 | 139 | 72  | 0.66 | 0.34 |
| H0YEU6   | 249 | 164 | 85  | 0.66 | 0.34 |
| Q96IZ5   | 413 | 272 | 141 | 0.66 | 0.34 |
| Q17RY0-2 | 712 | 468 | 244 | 0.66 | 0.34 |
| Q13247   | 344 | 226 | 118 | 0.66 | 0.34 |
| Q01130   | 221 | 145 | 76  | 0.66 | 0.34 |
| G3V129   | 304 | 199 | 105 | 0.65 | 0.35 |
| Q96EP5   | 407 | 266 | 141 | 0.65 | 0.35 |
| D6RD83   | 92  | 60  | 32  | 0.65 | 0.35 |
| H7BY36   | 308 | 200 | 108 | 0.65 | 0.35 |
| Q8NE35   | 698 | 453 | 245 | 0.65 | 0.35 |
| Q15427   | 424 | 275 | 149 | 0.65 | 0.35 |
| H0YB86   | 165 | 107 | 58  | 0.65 | 0.35 |
| J3QRF4   | 358 | 232 | 126 | 0.65 | 0.35 |
| P08621   | 437 | 283 | 154 | 0.65 | 0.35 |
| B4E3T4   | 224 | 145 | 79  | 0.65 | 0.35 |
| P08621-2 | 428 | 276 | 152 | 0.64 | 0.36 |
| Q9HCJ3   | 691 | 445 | 246 | 0.64 | 0.36 |
| Q9BWF3   | 364 | 234 | 130 | 0.64 | 0.36 |
| O43251-8 | 451 | 289 | 162 | 0.64 | 0.36 |
| Q96J87   | 481 | 308 | 173 | 0.64 | 0.36 |
| A6NDY0   | 278 | 178 | 100 | 0.64 | 0.36 |
| P42696   | 430 | 275 | 155 | 0.64 | 0.36 |
| Q9BQ04   | 359 | 228 | 131 | 0.64 | 0.36 |
| Q96I25   | 401 | 254 | 147 | 0.63 | 0.37 |
| B4DN89   | 209 | 132 | 77  | 0.63 | 0.37 |
| Q7Z5Q1-3 | 575 | 360 | 215 | 0.63 | 0.37 |
| H0YBD7   | 195 | 122 | 73  | 0.63 | 0.37 |
| B4E2X2   | 263 | 163 | 100 | 0.62 | 0.38 |
| A6NDY0-4 | 289 | 179 | 110 | 0.62 | 0.38 |
| F8VP89   | 275 | 170 | 105 | 0.62 | 0.38 |
| Q8WXA9-2 | 624 | 385 | 239 | 0.62 | 0.38 |
| Q9P2K5   | 600 | 370 | 230 | 0.62 | 0.38 |
| Q6XE24   | 437 | 269 | 168 | 0.62 | 0.38 |
| Q8NE35-2 | 684 | 421 | 263 | 0.62 | 0.38 |

|          |      |     |     |      |      |
|----------|------|-----|-----|------|------|
| Q8IXT5   | 1001 | 616 | 385 | 0.62 | 0.38 |
| Q86U06   | 439  | 270 | 169 | 0.62 | 0.38 |
| H7BXF3   | 127  | 78  | 49  | 0.61 | 0.39 |
| P49756-3 | 300  | 184 | 116 | 0.61 | 0.39 |
| Q9P2K5-3 | 188  | 115 | 73  | 0.61 | 0.39 |
| P19338   | 710  | 433 | 277 | 0.61 | 0.39 |
| Q7Z5Q1-7 | 548  | 334 | 214 | 0.61 | 0.39 |
| Q96J87-4 | 344  | 209 | 135 | 0.61 | 0.39 |
| Q8IY67   | 606  | 368 | 238 | 0.61 | 0.39 |
| E9PAU2   | 756  | 459 | 297 | 0.61 | 0.39 |
| Q8N9W6-3 | 295  | 179 | 116 | 0.61 | 0.39 |
| Q96H35   | 190  | 115 | 75  | 0.61 | 0.39 |
| Q9BRS8   | 491  | 297 | 194 | 0.60 | 0.40 |
| C9J4X2   | 124  | 75  | 49  | 0.60 | 0.40 |
| P51991   | 378  | 228 | 150 | 0.60 | 0.40 |
| Q92904-2 | 315  | 190 | 125 | 0.60 | 0.40 |
| O43347   | 362  | 218 | 144 | 0.60 | 0.40 |
| P22626   | 353  | 212 | 141 | 0.60 | 0.40 |
| P09651   | 372  | 223 | 149 | 0.60 | 0.40 |
| Q9BZC1   | 486  | 291 | 195 | 0.60 | 0.40 |
| P84103   | 164  | 98  | 66  | 0.60 | 0.40 |
| Q15233   | 471  | 281 | 190 | 0.60 | 0.40 |
| B4DQL3   | 260  | 155 | 105 | 0.60 | 0.40 |
| Q8WXF1   | 523  | 311 | 212 | 0.59 | 0.41 |
| Q9BTD8-3 | 451  | 268 | 183 | 0.59 | 0.41 |
| Q5QP21   | 202  | 120 | 82  | 0.59 | 0.41 |
| H0YHB7   | 233  | 138 | 95  | 0.59 | 0.41 |
| A6NDY0-2 | 255  | 151 | 104 | 0.59 | 0.41 |
| Q9P2K5-2 | 576  | 341 | 235 | 0.59 | 0.41 |
| Q9NW64   | 420  | 248 | 172 | 0.59 | 0.41 |
| O95319-3 | 521  | 307 | 214 | 0.59 | 0.41 |
| Q9BTD8   | 480  | 282 | 198 | 0.59 | 0.41 |
| Q8N6W0-2 | 409  | 240 | 169 | 0.59 | 0.41 |
| Q96J87-3 | 454  | 264 | 190 | 0.58 | 0.42 |
| Q96T37   | 977  | 568 | 409 | 0.58 | 0.42 |
| Q9UN86   | 482  | 280 | 202 | 0.58 | 0.42 |
| Q15434   | 407  | 236 | 171 | 0.58 | 0.42 |
| B4DN88   | 419  | 242 | 177 | 0.58 | 0.42 |
| E9PK21   | 208  | 120 | 88  | 0.58 | 0.42 |
| F5GWK3   | 371  | 214 | 157 | 0.58 | 0.42 |
| Q9NWB1-3 | 370  | 213 | 157 | 0.58 | 0.42 |
| Q14011   | 172  | 99  | 73  | 0.58 | 0.42 |
| Q9Y6M1-1 | 556  | 320 | 236 | 0.58 | 0.42 |
| Q96LT9   | 517  | 297 | 220 | 0.57 | 0.43 |
| Q8NDT2   | 890  | 511 | 379 | 0.57 | 0.43 |
| P29558   | 406  | 233 | 173 | 0.57 | 0.43 |

|          |      |     |     |      |      |
|----------|------|-----|-----|------|------|
| Q13283   | 466  | 267 | 199 | 0.57 | 0.43 |
| Q13243   | 272  | 155 | 117 | 0.57 | 0.43 |
| Q16560-2 | 251  | 143 | 108 | 0.57 | 0.43 |
| B9ZVT1   | 881  | 501 | 380 | 0.57 | 0.43 |
| Q9NTZ6   | 932  | 529 | 403 | 0.57 | 0.43 |
| E2PSN0   | 171  | 97  | 74  | 0.57 | 0.43 |
| Q14103   | 355  | 201 | 154 | 0.57 | 0.43 |
| Q9BZC1-5 | 448  | 253 | 195 | 0.56 | 0.44 |
| Q9NW13   | 759  | 427 | 332 | 0.56 | 0.44 |
| Q96DH6   | 328  | 184 | 144 | 0.56 | 0.44 |
| Q8N6W0   | 485  | 272 | 213 | 0.56 | 0.44 |
| Q8N9W6-2 | 339  | 189 | 150 | 0.56 | 0.44 |
| G5EA30   | 514  | 286 | 228 | 0.56 | 0.44 |
| B0QYY7   | 200  | 111 | 89  | 0.56 | 0.45 |
| Q9UN86-2 | 449  | 248 | 201 | 0.55 | 0.45 |
| D6RIA2   | 172  | 95  | 77  | 0.55 | 0.45 |
| P98179   | 157  | 86  | 71  | 0.55 | 0.45 |
| Q9NVM6   | 304  | 166 | 138 | 0.55 | 0.45 |
| Q9NQZ3   | 744  | 405 | 339 | 0.54 | 0.46 |
| F8WE16   | 114  | 62  | 52  | 0.54 | 0.46 |
| E9PC62   | 521  | 283 | 238 | 0.54 | 0.46 |
| F8VZG9   | 466  | 253 | 213 | 0.54 | 0.46 |
| F5GWN9   | 413  | 223 | 190 | 0.54 | 0.46 |
| C9J2Z9   | 247  | 133 | 114 | 0.54 | 0.46 |
| Q9NZI8   | 577  | 310 | 267 | 0.54 | 0.46 |
| Q4G0J3   | 582  | 312 | 270 | 0.54 | 0.46 |
| B7Z2K5   | 376  | 201 | 175 | 0.53 | 0.47 |
| E7EWI9   | 322  | 172 | 150 | 0.53 | 0.47 |
| C9JAA9   | 283  | 151 | 132 | 0.53 | 0.47 |
| C9JYS8   | 248  | 132 | 116 | 0.53 | 0.47 |
| Q9Y4C8   | 960  | 500 | 460 | 0.52 | 0.48 |
| Q99729-2 | 332  | 172 | 160 | 0.52 | 0.48 |
| F8W0K0   | 170  | 88  | 82  | 0.52 | 0.48 |
| F6WRY4   | 373  | 193 | 180 | 0.52 | 0.48 |
| H0Y623   | 466  | 241 | 225 | 0.52 | 0.48 |
| Q9BX46   | 236  | 122 | 114 | 0.52 | 0.48 |
| Q6ZRY4   | 209  | 108 | 101 | 0.52 | 0.48 |
| J3KN81   | 165  | 85  | 80  | 0.52 | 0.48 |
| H7C367   | 235  | 121 | 114 | 0.51 | 0.49 |
| P31942   | 346  | 178 | 168 | 0.51 | 0.49 |
| O14979   | 420  | 216 | 204 | 0.51 | 0.49 |
| P78332   | 1123 | 576 | 547 | 0.51 | 0.49 |
| F8W930   | 605  | 310 | 295 | 0.51 | 0.49 |
| Q14498   | 530  | 271 | 259 | 0.51 | 0.49 |
| Q92843-2 | 333  | 170 | 163 | 0.51 | 0.49 |
| Q8IUH3   | 476  | 243 | 233 | 0.51 | 0.49 |

|          |     |     |     |      |      |
|----------|-----|-----|-----|------|------|
| Q9H0Z9   | 239 | 122 | 117 | 0.51 | 0.49 |
| Q5SZQ7   | 415 | 211 | 204 | 0.51 | 0.49 |
| H7C476   | 135 | 68  | 67  | 0.50 | 0.50 |
| O00425   | 579 | 291 | 288 | 0.50 | 0.50 |
| Q8WUA2   | 492 | 246 | 246 | 0.50 | 0.50 |
| Q13148-2 | 416 | 208 | 208 | 0.50 | 0.50 |
| Q13148-3 | 260 | 130 | 130 | 0.50 | 0.50 |
| H0YA61   | 80  | 40  | 40  | 0.50 | 0.50 |
| Q9Y5S9   | 174 | 86  | 88  | 0.49 | 0.51 |
| F8WD91   | 87  | 43  | 44  | 0.49 | 0.51 |
| P52298   | 156 | 77  | 79  | 0.49 | 0.51 |
| A6PVI3   | 153 | 75  | 78  | 0.49 | 0.51 |
| E5RJV8   | 149 | 73  | 76  | 0.49 | 0.51 |
| Q02040-3 | 445 | 216 | 229 | 0.49 | 0.51 |
| F8WB35   | 200 | 97  | 103 | 0.49 | 0.52 |
| C9JT33   | 438 | 212 | 226 | 0.48 | 0.52 |
| H0Y5F5   | 550 | 266 | 284 | 0.48 | 0.52 |
| H3BUA9   | 588 | 282 | 306 | 0.48 | 0.52 |
| Q99729-4 | 286 | 137 | 149 | 0.48 | 0.52 |
| H0Y4X3   | 337 | 160 | 177 | 0.47 | 0.53 |
| F8W1T6   | 344 | 163 | 181 | 0.47 | 0.53 |
| H0Y8T4   | 334 | 158 | 176 | 0.47 | 0.53 |
| Q99729   | 332 | 157 | 175 | 0.47 | 0.53 |
| G8JLB6   | 472 | 223 | 249 | 0.47 | 0.53 |
| O60506   | 623 | 294 | 329 | 0.47 | 0.53 |
| A0AV96   | 593 | 279 | 314 | 0.47 | 0.53 |
| Q13151   | 305 | 143 | 162 | 0.47 | 0.53 |
| Q32P51   | 320 | 150 | 170 | 0.47 | 0.53 |
| Q13310-3 | 660 | 309 | 351 | 0.47 | 0.53 |
| H0YIL2   | 110 | 51  | 59  | 0.46 | 0.54 |
| O95758-4 | 558 | 258 | 300 | 0.46 | 0.54 |
| F6T1J1   | 158 | 73  | 85  | 0.46 | 0.54 |
| H0YCP8   | 273 | 126 | 147 | 0.46 | 0.54 |
| P26368   | 475 | 219 | 256 | 0.46 | 0.54 |
| E9PB51   | 240 | 110 | 130 | 0.46 | 0.54 |
| Q13310   | 644 | 295 | 349 | 0.46 | 0.54 |
| Q9UHX1   | 559 | 255 | 304 | 0.46 | 0.54 |
| Q5H918   | 244 | 111 | 133 | 0.45 | 0.55 |
| O43390-2 | 636 | 289 | 347 | 0.45 | 0.55 |
| G3V2S9   | 124 | 56  | 68  | 0.45 | 0.55 |
| P11940   | 636 | 285 | 351 | 0.45 | 0.55 |
| Q17RY0-3 | 322 | 144 | 178 | 0.45 | 0.55 |
| B4DMM2   | 186 | 83  | 103 | 0.45 | 0.55 |
| Q13310-2 | 631 | 280 | 351 | 0.44 | 0.56 |
| E5RFP2   | 339 | 150 | 189 | 0.44 | 0.56 |
| B1ANR0   | 615 | 271 | 344 | 0.44 | 0.56 |

|          |      |     |     |      |      |
|----------|------|-----|-----|------|------|
| Q9H361   | 631  | 278 | 353 | 0.44 | 0.56 |
| F8VRS4   | 391  | 172 | 219 | 0.44 | 0.56 |
| P14866   | 589  | 259 | 330 | 0.44 | 0.56 |
| B1APY8   | 385  | 169 | 216 | 0.44 | 0.56 |
| H0YHU8   | 144  | 63  | 81  | 0.44 | 0.56 |
| P09012   | 282  | 123 | 159 | 0.44 | 0.56 |
| P52597   | 415  | 180 | 235 | 0.43 | 0.57 |
| J3KP15   | 134  | 58  | 76  | 0.43 | 0.57 |
| Q9Y3B4   | 125  | 54  | 71  | 0.43 | 0.57 |
| P55795   | 449  | 192 | 257 | 0.43 | 0.57 |
| Q4VXU2   | 614  | 262 | 352 | 0.43 | 0.57 |
| E9PCY7   | 429  | 183 | 246 | 0.43 | 0.57 |
| O14979-3 | 244  | 104 | 140 | 0.43 | 0.57 |
| C9IYN3   | 282  | 119 | 163 | 0.42 | 0.58 |
| F6W1U9   | 147  | 62  | 85  | 0.42 | 0.58 |
| P31483-2 | 375  | 158 | 217 | 0.42 | 0.58 |
| J3QL05   | 130  | 54  | 76  | 0.42 | 0.58 |
| Q9UHX1-2 | 542  | 225 | 317 | 0.42 | 0.58 |
| J3KQV8   | 1612 | 668 | 944 | 0.41 | 0.59 |
| Q14576   | 367  | 152 | 215 | 0.41 | 0.59 |
| F6UBL3   | 133  | 55  | 78  | 0.41 | 0.59 |
| F5H0R1   | 912  | 376 | 536 | 0.41 | 0.59 |
| F8W646   | 156  | 63  | 93  | 0.40 | 0.60 |
| H0YJU7   | 72   | 29  | 43  | 0.40 | 0.60 |
| P26599-3 | 557  | 224 | 333 | 0.40 | 0.60 |
| J3KPK1   | 1526 | 610 | 916 | 0.40 | 0.60 |
| B4DSS8   | 548  | 219 | 329 | 0.40 | 0.60 |
| Q13242   | 221  | 87  | 134 | 0.39 | 0.61 |
| Q01085-2 | 392  | 154 | 238 | 0.39 | 0.61 |
| P26599   | 531  | 208 | 323 | 0.39 | 0.61 |
| P26378-3 | 383  | 150 | 233 | 0.39 | 0.61 |
| Q6ZP01   | 1051 | 410 | 641 | 0.39 | 0.61 |
| P31483   | 386  | 149 | 237 | 0.39 | 0.61 |
| D6W592   | 542  | 208 | 334 | 0.38 | 0.62 |
| H0YFY9   | 128  | 49  | 79  | 0.38 | 0.62 |
| Q12849   | 480  | 183 | 297 | 0.38 | 0.62 |
| O75821   | 320  | 121 | 199 | 0.38 | 0.62 |
| B7ZKM0   | 927  | 344 | 583 | 0.37 | 0.63 |
| P05455   | 408  | 151 | 257 | 0.37 | 0.63 |
| B1AM49   | 387  | 143 | 244 | 0.37 | 0.63 |
| Q9H6T0   | 727  | 268 | 459 | 0.37 | 0.63 |
| E9PKU1   | 114  | 42  | 72  | 0.37 | 0.63 |
| Q5SZ64   | 190  | 69  | 121 | 0.36 | 0.64 |
| C9JZG1   | 302  | 109 | 193 | 0.36 | 0.64 |
| B4DTC1   | 131  | 47  | 84  | 0.36 | 0.64 |
| H0Y3K3   | 84   | 30  | 54  | 0.36 | 0.64 |

|          |      |     |      |      |      |
|----------|------|-----|------|------|------|
| D6RBK5   | 121  | 43  | 78   | 0.36 | 0.64 |
| H0Y5U7   | 297  | 104 | 193  | 0.35 | 0.65 |
| P08621-3 | 166  | 58  | 108  | 0.35 | 0.65 |
| Q15020   | 963  | 335 | 628  | 0.35 | 0.65 |
| Q9NQ94   | 594  | 206 | 388  | 0.35 | 0.65 |
| O43251-3 | 358  | 122 | 236  | 0.34 | 0.66 |
| C9J6C5   | 166  | 56  | 110  | 0.34 | 0.66 |
| E9PIA5   | 39   | 13  | 26   | 0.33 | 0.67 |
| H0YBN4   | 175  | 57  | 118  | 0.33 | 0.67 |
| Q9Y4F3   | 1742 | 567 | 1175 | 0.33 | 0.67 |
| B4DVB8   | 353  | 114 | 239  | 0.32 | 0.68 |
| Q01081   | 240  | 77  | 163  | 0.32 | 0.68 |
| Q8TBY0   | 533  | 169 | 364  | 0.32 | 0.68 |
| H7BY16   | 297  | 94  | 203  | 0.32 | 0.68 |
| D6RBM0   | 212  | 67  | 145  | 0.32 | 0.68 |
| D6RF41   | 133  | 42  | 91   | 0.32 | 0.68 |
| Q6NXG1   | 681  | 213 | 468  | 0.31 | 0.69 |
| Q8N7X1   | 1067 | 333 | 734  | 0.31 | 0.69 |
| E5RGV0   | 155  | 48  | 107  | 0.31 | 0.69 |
| Q13247-2 | 135  | 41  | 94   | 0.30 | 0.70 |
| Q8WU68-2 | 202  | 61  | 141  | 0.30 | 0.70 |
| Q8IYX4   | 353  | 106 | 247  | 0.30 | 0.70 |
| B8ZZ74   | 159  | 47  | 112  | 0.30 | 0.70 |
| A6NLN1   | 197  | 58  | 139  | 0.29 | 0.71 |
| C9JKX0   | 1430 | 421 | 1009 | 0.29 | 0.71 |
| P08579   | 225  | 66  | 159  | 0.29 | 0.71 |
| B4DUA4   | 138  | 40  | 98   | 0.29 | 0.71 |
| C9JB16   | 90   | 26  | 64   | 0.29 | 0.71 |
| E9PFH8   | 361  | 103 | 258  | 0.29 | 0.71 |
| F8VV04   | 771  | 218 | 553  | 0.28 | 0.72 |
| Q96IC2   | 774  | 217 | 557  | 0.28 | 0.72 |
| H7BZE0   | 73   | 20  | 53   | 0.27 | 0.73 |
| Q96IC2-2 | 743  | 203 | 540  | 0.27 | 0.73 |
| E5RFV3   | 132  | 36  | 96   | 0.27 | 0.73 |
| G8JLP4   | 1577 | 430 | 1147 | 0.27 | 0.73 |
| O95453   | 639  | 171 | 468  | 0.27 | 0.73 |
| H0YAP2   | 131  | 35  | 96   | 0.27 | 0.73 |
| Q07955-2 | 292  | 77  | 215  | 0.26 | 0.74 |
| G3V546   | 115  | 30  | 85   | 0.26 | 0.74 |
| Q13287   | 307  | 79  | 228  | 0.26 | 0.74 |
| J3QQZ2   | 328  | 83  | 245  | 0.25 | 0.75 |
| J3QKT5   | 99   | 25  | 74   | 0.25 | 0.75 |
| P38159-3 | 196  | 49  | 147  | 0.25 | 0.75 |
| P55884-2 | 873  | 217 | 656  | 0.25 | 0.75 |
| F8VTQ5   | 145  | 36  | 109  | 0.25 | 0.75 |
| Q9P1R7   | 145  | 36  | 109  | 0.25 | 0.75 |

|          |      |     |      |      |      |
|----------|------|-----|------|------|------|
| E5RG71   | 85   | 20  | 65   | 0.24 | 0.76 |
| E7EPF2   | 128  | 30  | 98   | 0.23 | 0.77 |
| J3KSW7   | 73   | 17  | 56   | 0.23 | 0.77 |
| Q8WU68-3 | 181  | 42  | 139  | 0.23 | 0.77 |
| C9JE21   | 204  | 47  | 157  | 0.23 | 0.77 |
| Q5QPM2   | 89   | 20  | 69   | 0.22 | 0.78 |
| E9PAM1   | 383  | 82  | 301  | 0.21 | 0.79 |
| Q5T0W7   | 201  | 43  | 158  | 0.21 | 0.79 |
| Q5TGA3   | 314  | 67  | 247  | 0.21 | 0.79 |
| Q8WU68   | 220  | 46  | 174  | 0.21 | 0.79 |
| Q5VZ19   | 366  | 76  | 290  | 0.21 | 0.79 |
| Q96DU9   | 382  | 78  | 304  | 0.20 | 0.80 |
| F8VYN5   | 113  | 22  | 91   | 0.19 | 0.81 |
| H0YAM1   | 114  | 22  | 92   | 0.19 | 0.81 |
| H0YCC8   | 197  | 38  | 159  | 0.19 | 0.81 |
| E7ETC0   | 135  | 26  | 109  | 0.19 | 0.81 |
| J3KTH5   | 428  | 82  | 346  | 0.19 | 0.81 |
| H0YIB4   | 110  | 21  | 89   | 0.19 | 0.81 |
| F2Z2W7   | 643  | 111 | 532  | 0.17 | 0.83 |
| Q9NX07   | 287  | 49  | 238  | 0.17 | 0.83 |
| Q8IZ69   | 625  | 106 | 519  | 0.17 | 0.83 |
| H3BNC1   | 37   | 6   | 31   | 0.16 | 0.84 |
| F8WD15   | 81   | 12  | 69   | 0.15 | 0.85 |
| Q8TAS1   | 419  | 61  | 358  | 0.15 | 0.85 |
| E5RG67   | 161  | 22  | 139  | 0.14 | 0.86 |
| I3L0J9   | 1013 | 138 | 875  | 0.14 | 0.86 |
| H3BR27   | 78   | 10  | 68   | 0.13 | 0.87 |
| H0YJ07   | 56   | 7   | 49   | 0.13 | 0.88 |
| F5H674   | 70   | 8   | 62   | 0.11 | 0.89 |
| Q5JQF8   | 200  | 20  | 180  | 0.10 | 0.90 |
| F2Z2U1   | 81   | 8   | 73   | 0.10 | 0.90 |
| C9J787   | 92   | 9   | 83   | 0.10 | 0.90 |
| B1ANR1   | 129  | 12  | 117  | 0.09 | 0.91 |
| Q6P2Q9   | 2335 | 194 | 2141 | 0.08 | 0.92 |
| G3V2B4   | 51   | 4   | 47   | 0.08 | 0.92 |
| J3QKU3   | 65   | 5   | 60   | 0.08 | 0.92 |
| E9PGX9   | 120  | 8   | 112  | 0.07 | 0.93 |
| E5RI26   | 94   | 5   | 89   | 0.05 | 0.95 |
| E5RJB9   | 129  | 6   | 123  | 0.05 | 0.95 |
